# Supplementary material for: Antibody-Drug Conjugate Targeting c-Kit for the Treatment of Small Cell Lung Cancer
Source: MDPI journal article supplement (doi:10.3390/ijms23042264), 2022-02-18
Supplement: s1 [file s1]

## Supplementary Materials

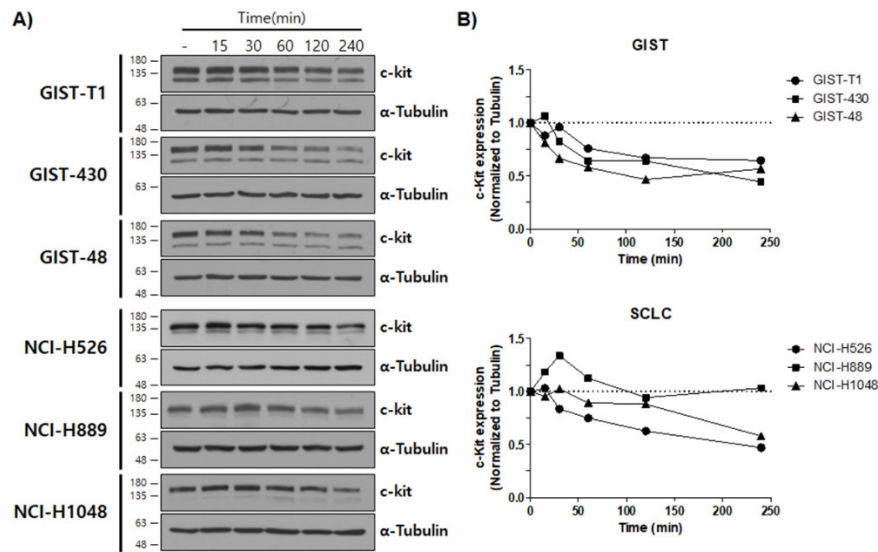

**Supplementary Figure S1.** Stability assessment of c-Kit protein. 4C9 antibody (10  $\mu$ g/ml) was treated to each cell line with the indicated time point and the expression level of c-Kit was determined by western blot (A). (B) Total c-Kit protein was quantitated using ImageJ program and normalized to alpha-tubulin. The results represent the mean  $\pm$  SD of three independent experiments. Alpha-tubulin was used as a loading control.

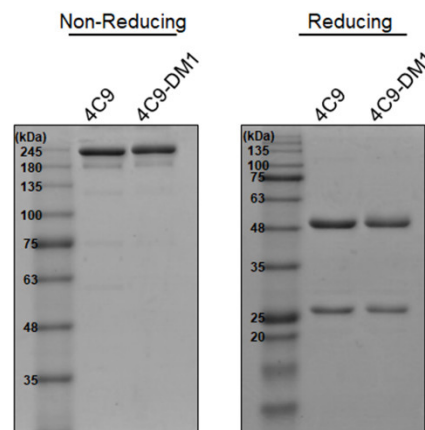

**Supplementary Figure S2.** Comparison of 4C9 and 4C9-DM1 in SDS-PAGE. Each 10  $\mu$ g protein was loaded to SDS-PAGE and stained with Coomassie Brilliant Blue G250 and destained with 50% methanol.

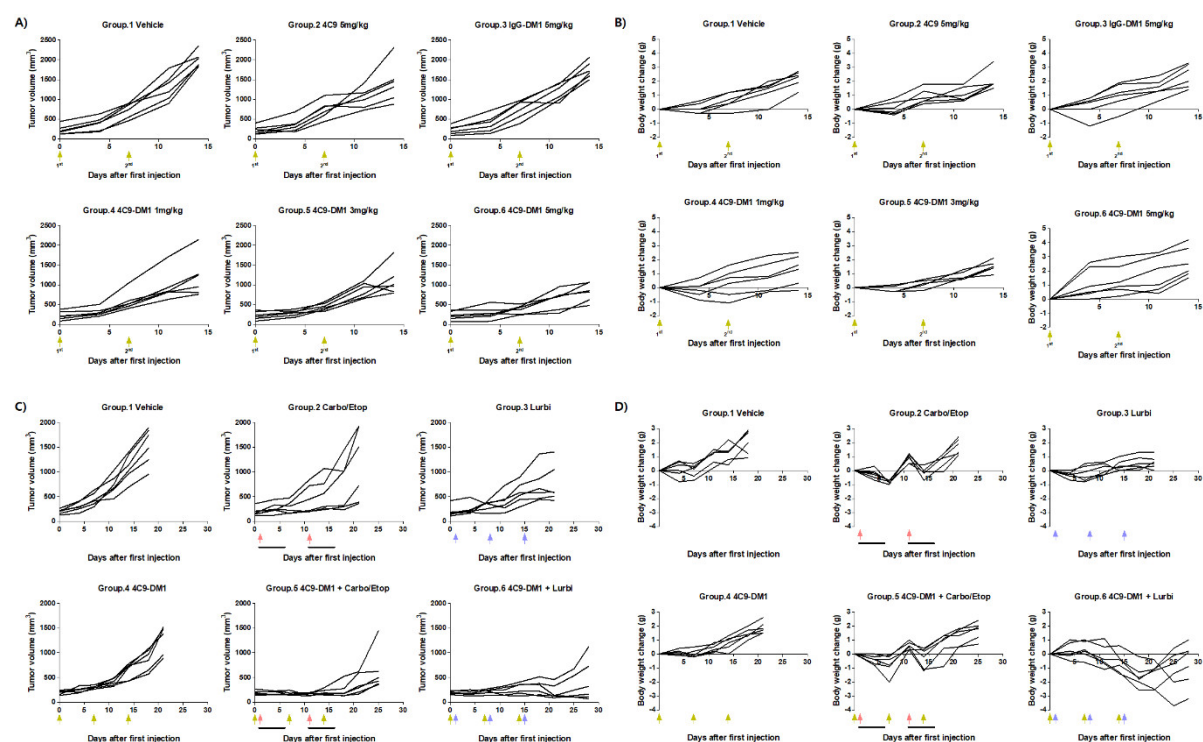

**Supplementary Figure S3. Individual analysis of anti-tumor activity and body weight change.** The results shown in figure 5 are presented for each individual (n = 6).

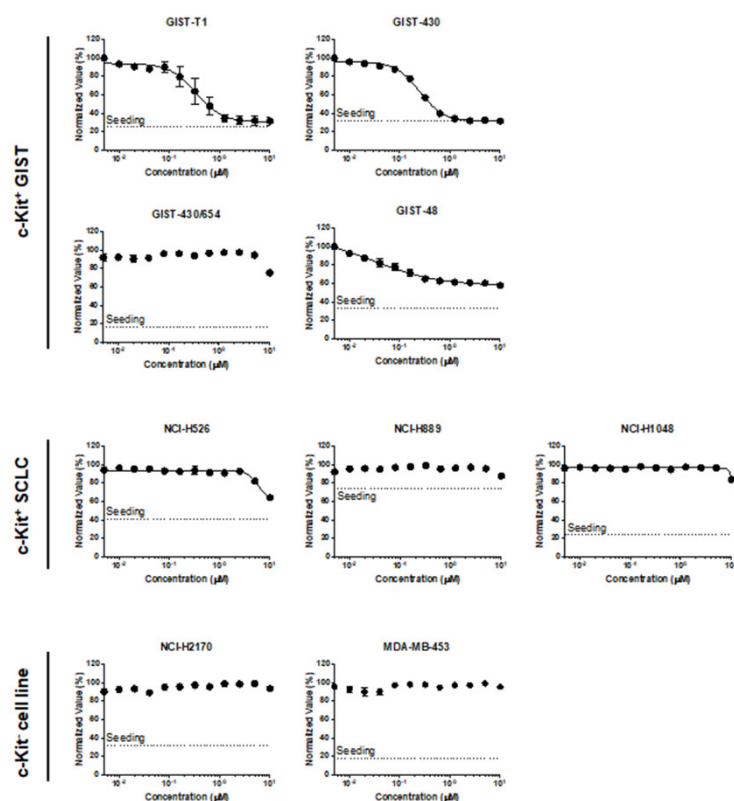

**Supplementary Figure S4. The assessment of inhibitory concentration of imatinib in various cancer cell**

lines. Cells were seeded into 96-well plates and incubated with imatinib for 3-4 days. Then, total cells were stained with Hoechst 33342 (10  $\mu$ M) at 37 °C for 30 min and quantitated using a Celigo Imaging Cytometer. The results represent mean  $\pm$  standard error of mean from at least three independent experiments.

**Supplementary Table S1.** *In vitro* IC<sub>50</sub> value of imatinib

| c-Kit expression  | Tissue type   | Cell line                 | Imatinib ( $\mu$ M) |
|-------------------|---------------|---------------------------|---------------------|
| c-Kit<br>positive | GIST          | GIST-T1                   | 0.3357              |
|                   |               | GIST-430                  | 0.2497              |
|                   |               | GIST-430/654 <sup>†</sup> | N/E*                |
|                   |               | GIST-48                   | 0.0306              |
|                   | SCLC          | NCI-H526                  | 5.924               |
|                   |               | NCI-H889                  | N/E                 |
|                   |               | NCI-H1048                 | N/E                 |
| c-Kit<br>negative | SCLC          | NCI-H2170                 | N/E                 |
|                   | Breast cancer | MDA-MB-453                | N/E                 |

\*N/E: not effective up to 10 Mm; †, this cell line is resistant to imatinib due to c-Kit activating mutation
